# Supplementary material for: Underutilization and disparities in access to EGFR testing among Medicare patients with lung cancer from 2010 – 2013
Source: BMC Cancer. 2018 Mar 20;18:306. doi: 10.1186/s12885-018-4190-3 (PMC5859516; doi:10.1186/s12885-018-4190-3)
Supplement: Supplementary file 2 — Timeline of selected clinical guidelines and regulatory decisions. (XLSX 12 kb) [file 12885_2018_4190_MOESM2_ESM.xlsx]

## Sheet: Supplement 2
	Supplement 2. Timeline of selected clinical guidelines and regulatory decisions
	Year	Group	Criteria
	2003	FDA	Gefitinib approved for locally advanced or metastatic NSCLC
	2004	Lynch et al.; Paez et al.; Pao et al.	Reports that mutations in the EGFR kinase domain in lung cancers are associated with responsiveness to gefitinib and erlotinib
	2004	FDA	Erlotinib approved as second-line therapy. No indication for histologic type or EGFR status
	2005	Genzyme Genetics	Commercialized the EGFR assay
	2007	NCCN	Guidelines encouraged oncologists to consider molecular testing to identify patients who may response to EGFR tyrosine kinase inhibitors
	2008	CMS	EGFR testing reimbursed by Medicare
	2009	ASCO NCCN	Recommended use of EGFR TKIs to treat patients with EGFR-positive tumors
	2010	FDA	Erlotinib approved for maintenance treatment of patients with locally advanced or metastatic NSCLC whose disease has not progressed after four cycles of platinum-based first-line chemotherapy
	2010	NCCN	Recommended EGFR mutational analysis, no specifications about which patients to test
	2011	ASCO NCCN	Guidelines recommended patients with histological subtype adenocarcinoma, large cell carcinoma, or not otherwise specified to be tested for an EGFR mutation
	2013	FDA	Erlotinib approved for the first-line treatment of metastatic NSCLC patients whose tumors have EGFR exon 19 deletions or exon 21 (L858R) substitution mutations, as detected by an FDA-approved test
	2013	FDA	First FDA approval of a companion diagnostic test for EGFR, the cobas EGFR Mutation Test (Roche Molecular Diagnostics)
	2013	CAP, IASLC, AMP	Jointly recommended EGFR testing at the time of diagnosis for stage IV NSCLC patients who are eligible for treatment. Also EGFR testing of tumors at diagnosis from patients presenting with stage I, II, or III disease as encouraged but the decision to do so should be made individually.
	2013	FDA	First FDA approval of a companion diagnostic test for EGFR
	Abbreviations: FDA, Food & Drug Administration; NCCN, National Comprehensive Cancer Network; CMS, Centers for Medicare & Medicaid Services; ASCO, American Society of Clinical Oncology; CAP, College of American Pathologists; IASCL, International Association for the Study of Lung Cancer; AMP, Association for Molecular Pathology
